# Supplementary material for: A non-aggregation colorimetric method for trace lead(ii) ions based on the leaching of gold nanorods
Source: Royal Society of Chemistry journal article supplement (doi:10.1039/c4ay00972j), 2014-01-01
Supplement: c4ay00972j1.pdf [file c4ay00972j1.pdf]

**Supporting information**

**A non-aggregation colorimetric method for trace lead(II) ions based on the  
leaching of gold nanorods**

Yu-Ching Lan, and Yang-Wei Lin\*

Department of Chemistry, National Changhua University of Education, Changhua,

Taiwan

Address correspondence to the author at 1, Jin-De Road, Department of Chemistry,

National Changhua University of Education, Changhua City, PO Box 500, Taiwan;

Fax: +886-4-721-1190; E-mail: [linyejerry@cc.ncue.edu.tw](mailto:linyejerry@cc.ncue.edu.tw)

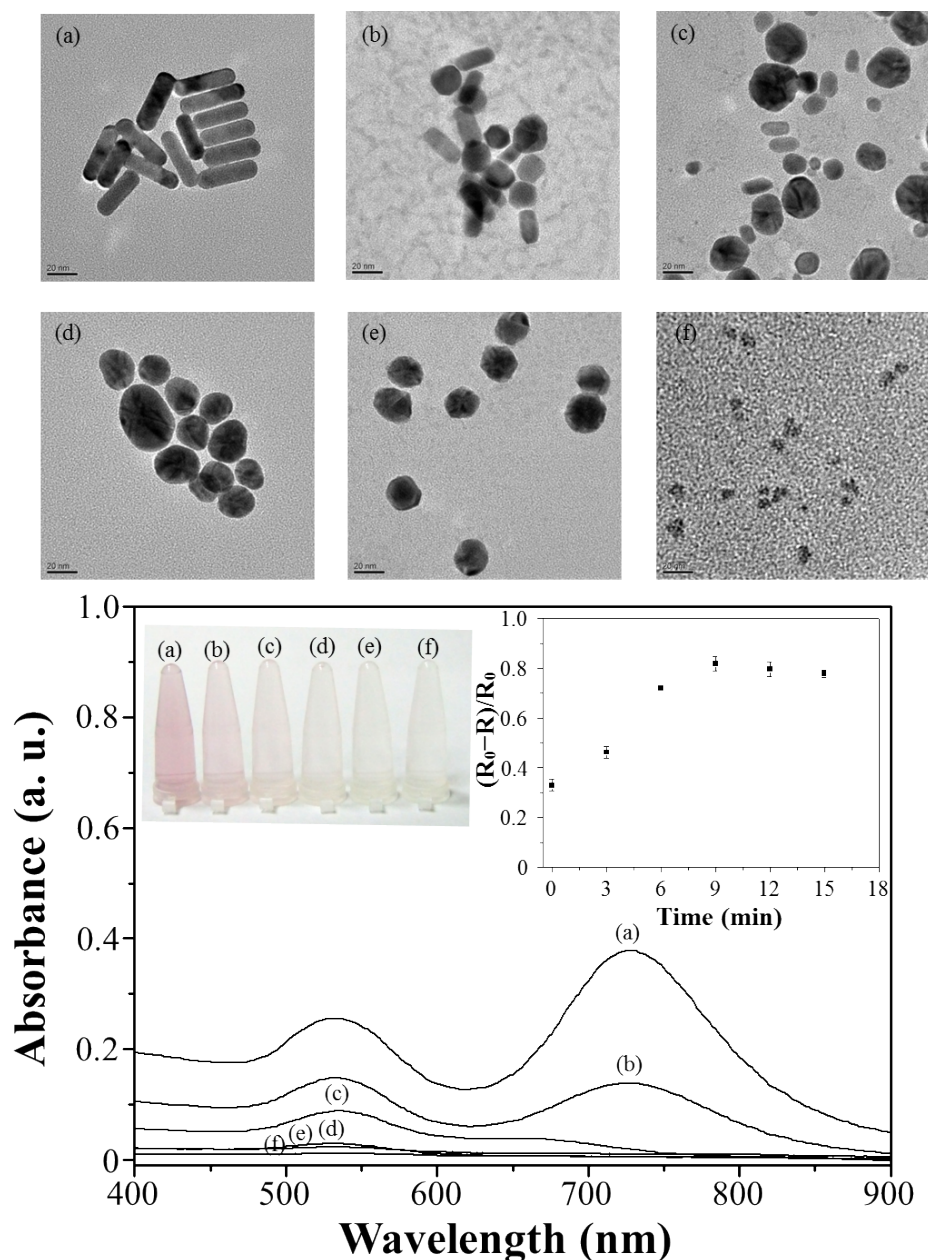

**Figure S1.** Photograph (left inset), UV-Vis absorption spectra, and TEM images (scale bar = 20 nm) of the Au NRs after different amounts of time in the presence of 100  $\mu\text{M}$   $\text{Pb}^{2+}$  and 3.0 mM  $\text{S}_2\text{O}_3^{2-}$  at 50  $^\circ\text{C}$ . Right inset: leaching effect  $(R_0 - R)/R_0$  for the  $\text{S}_2\text{O}_3^{2-}/\text{Au}$  NRs over time, R and  $R_0$  are the SPR band ratios ( $A_{750}/A_{530}$ ) of the Au NRs in the presence and absence of  $\text{Pb}^{2+}$  ions, respectively.

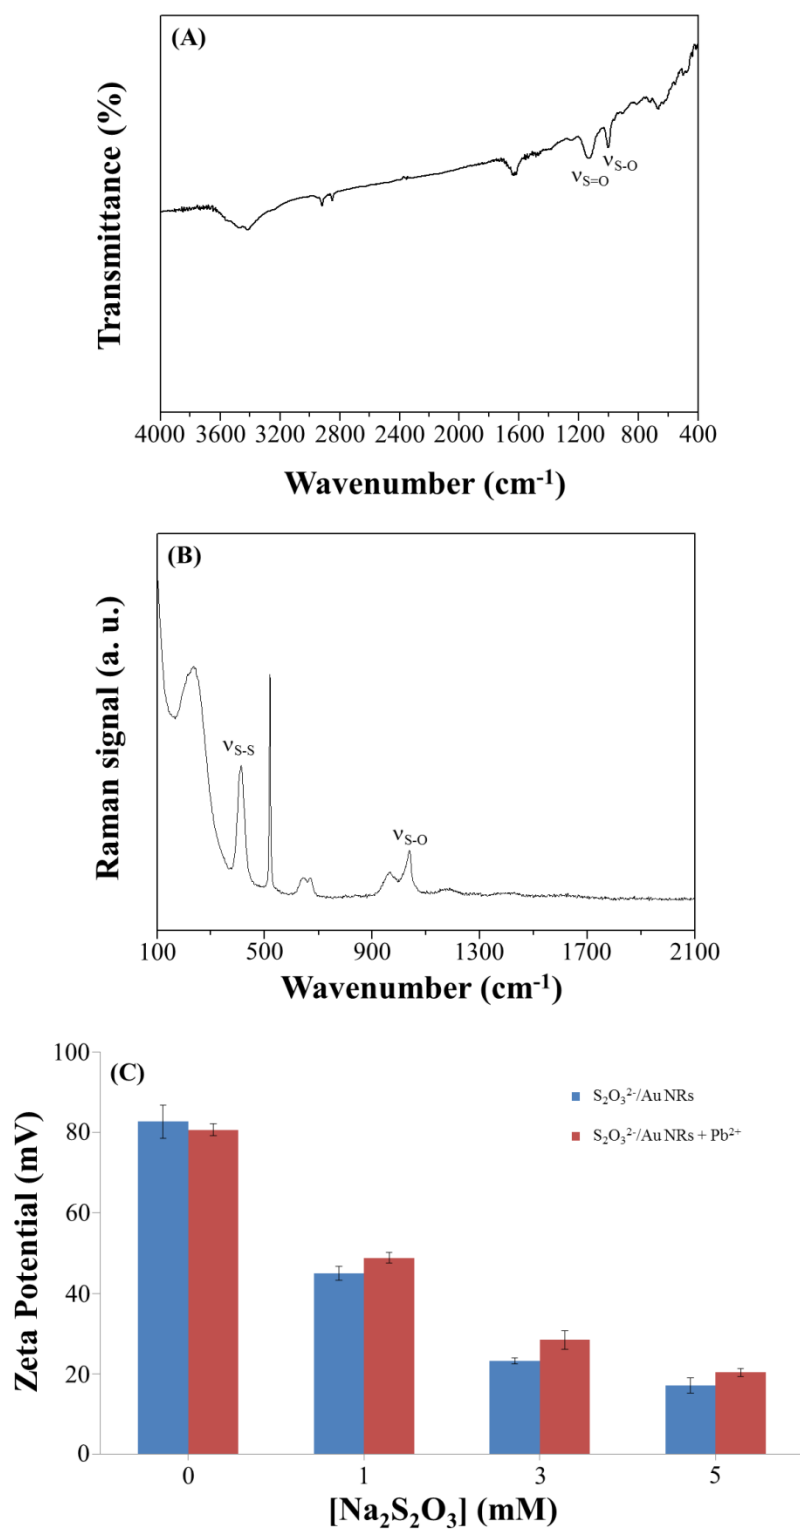

**Figure S2.** (A) FT-IR spectrum, (B) Raman spectrum, and (C) Zeta potential of the Au NRs in the presence of different concentrations of S<sub>2</sub>O<sub>3</sub><sup>2-</sup> (0–5 mM).

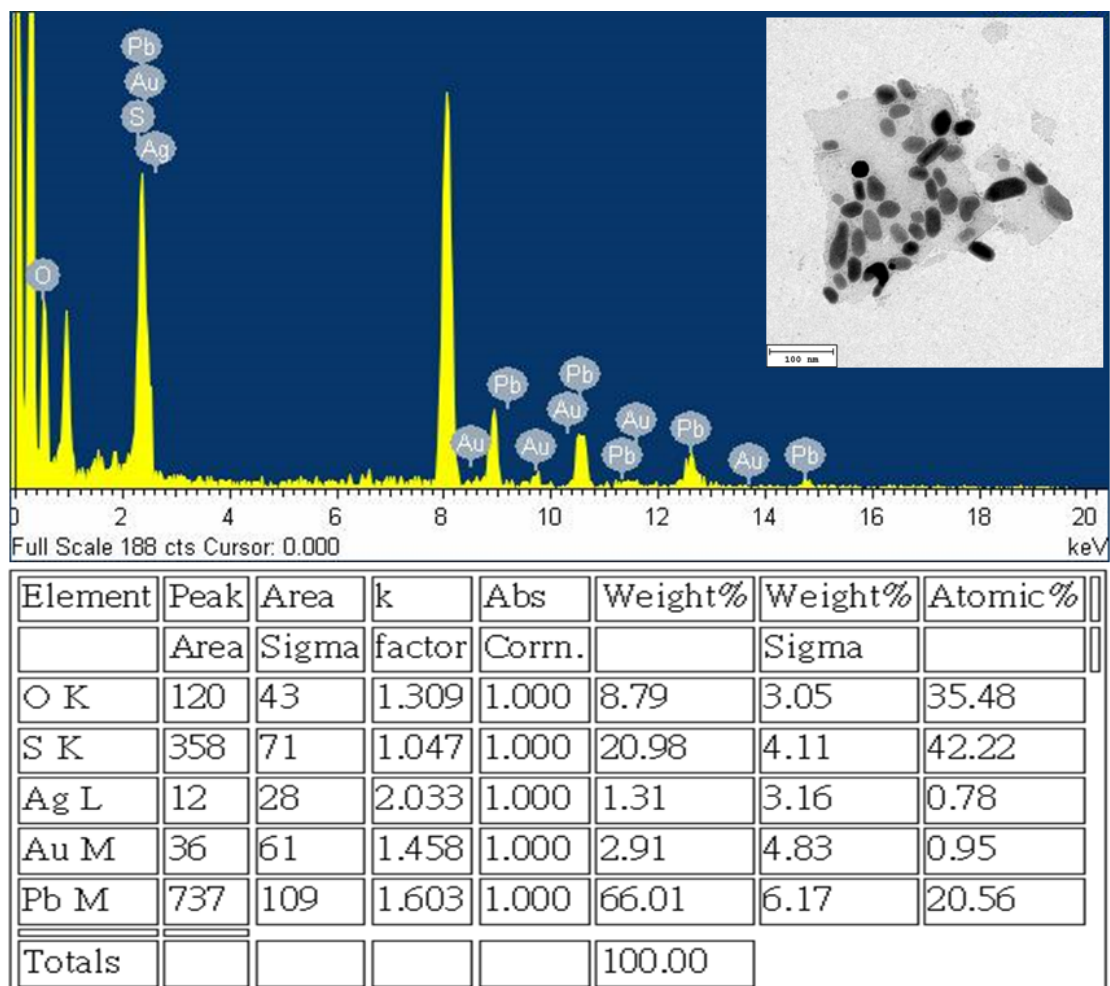

**Figure S3.** EDS spectrum of the Au NRs in the presence of 3.0 mM  $S_2O_3^{2-}$  and 100  $\mu$ M  $Pb^{2+}$  at 50 °C.

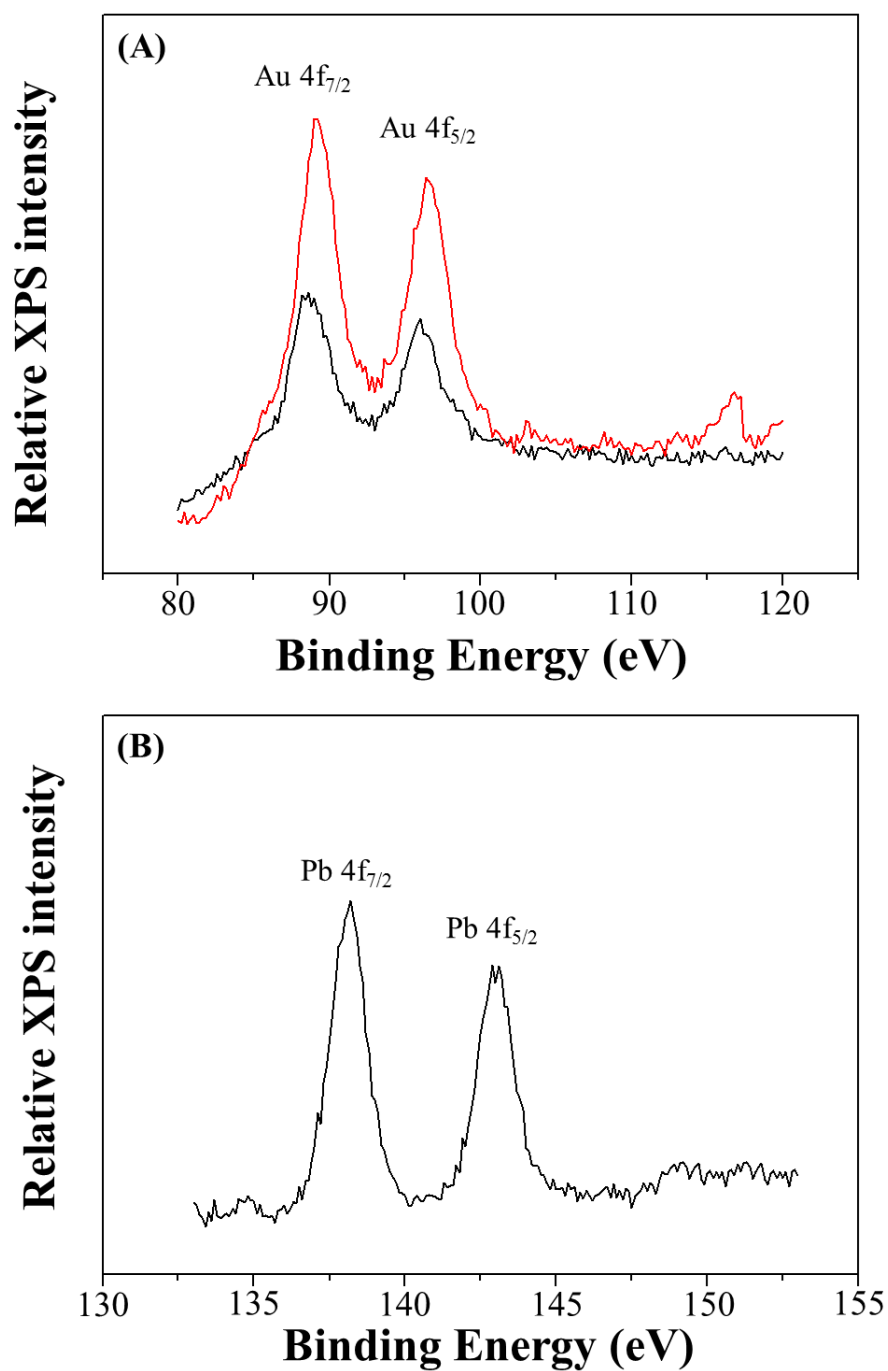

**Figure S4.** (A) Binding energies of the 4f<sub>7/2</sub> and 4f<sub>5/2</sub> electrons of the S<sub>2</sub>O<sub>3</sub><sup>2-</sup>/Au NRs in the absence (black line) and presence (red line) of Pb<sup>2+</sup> ions. (B) Relative XPS intensity plotted against the binding energy, with the peaks for the Pb 4f<sub>7/2</sub> and 4f<sub>5/2</sub> electrons marked.

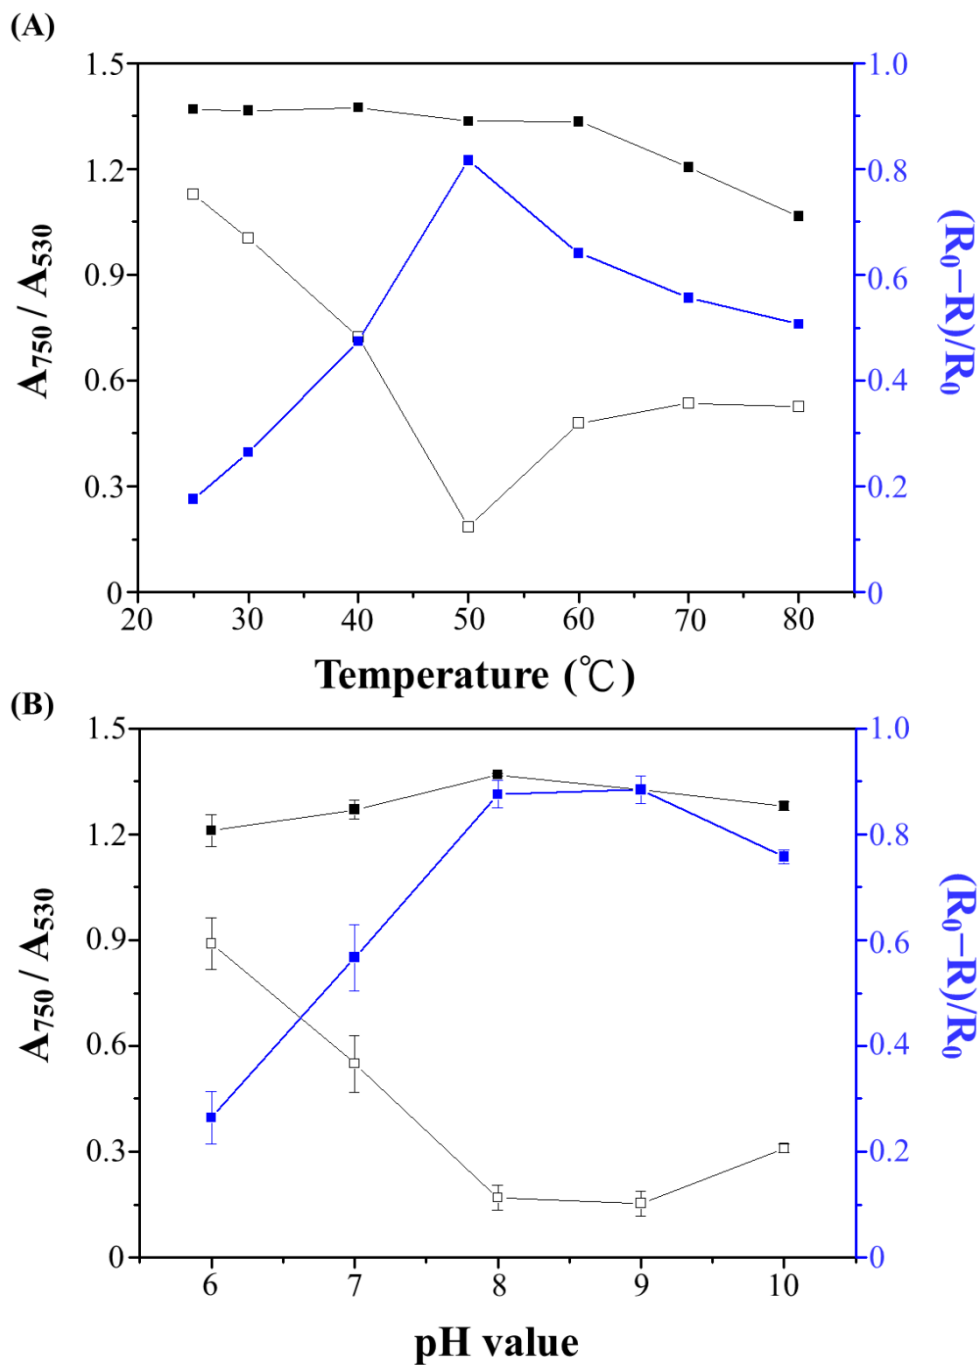

**Figure S5.** Absorbance ratios and leaching effects for the  $S_2O_3^{2-}/Au$  NRs in the absence (■) and presence (□) of  $Pb^{2+}$ , using a Tris-HCl buffer solution (10 mM), at different (A) temperatures and (B) pH values. The error bars represent the standard deviations for triplicate experiments.

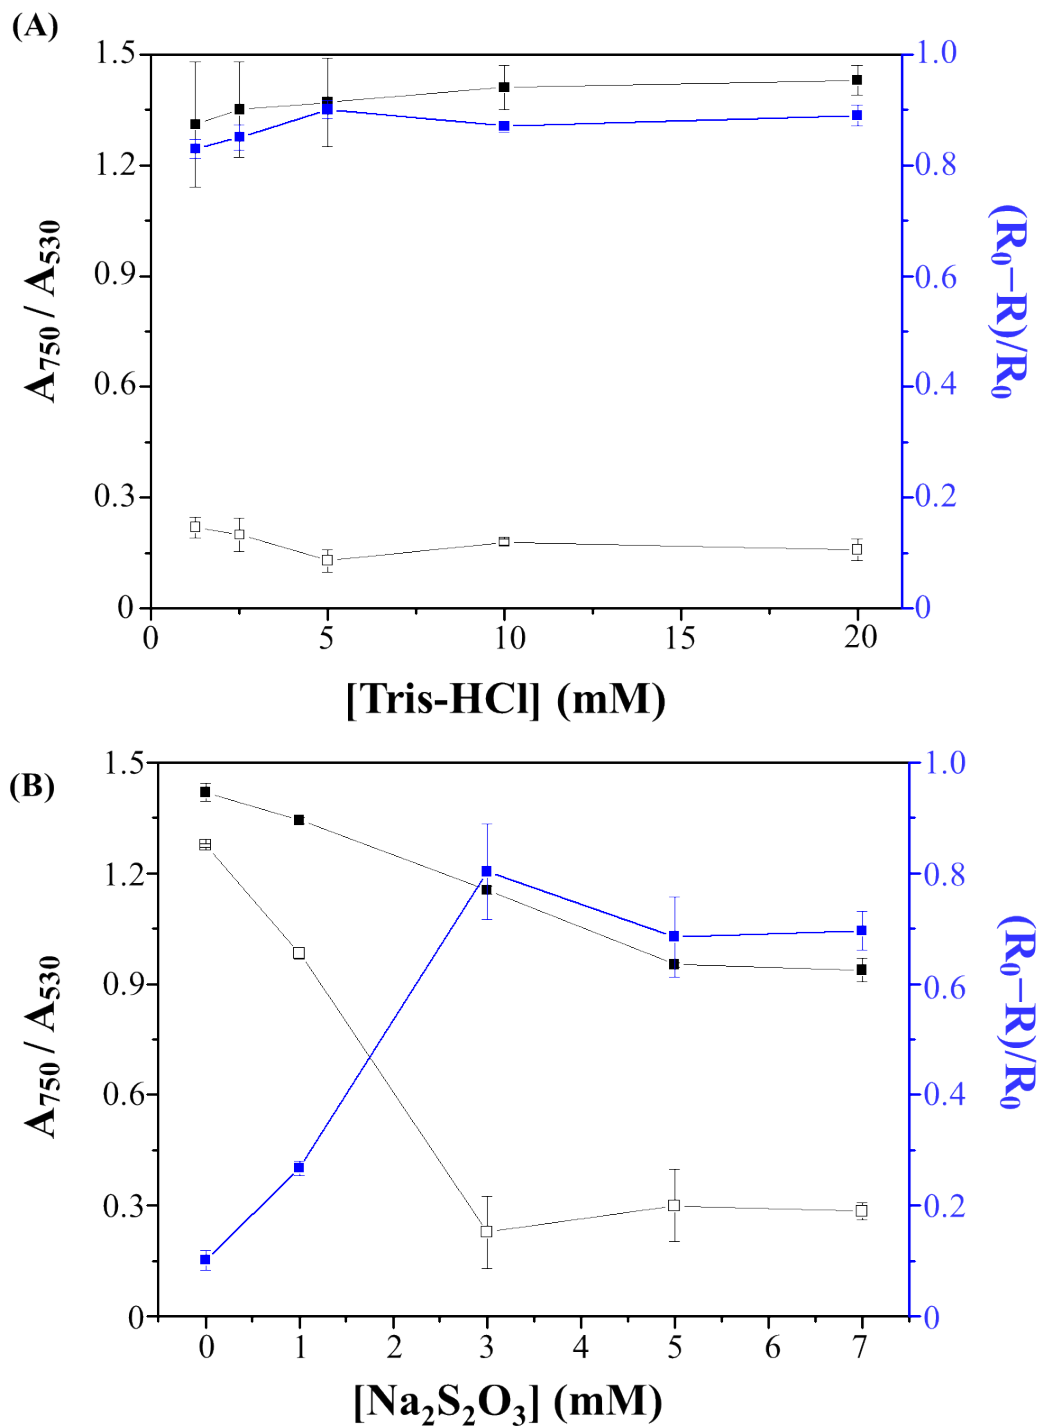

**Figure S6.** Absorbance ratios and leaching effects for the Au NRs in the absence (■) and presence (□) of  $Pb^{2+}$  at different concentrations of (A) Tris-HCl buffer and (B)  $Na_2S_2O_3$ . The error bars represent the standard deviations for triplicate experiments.

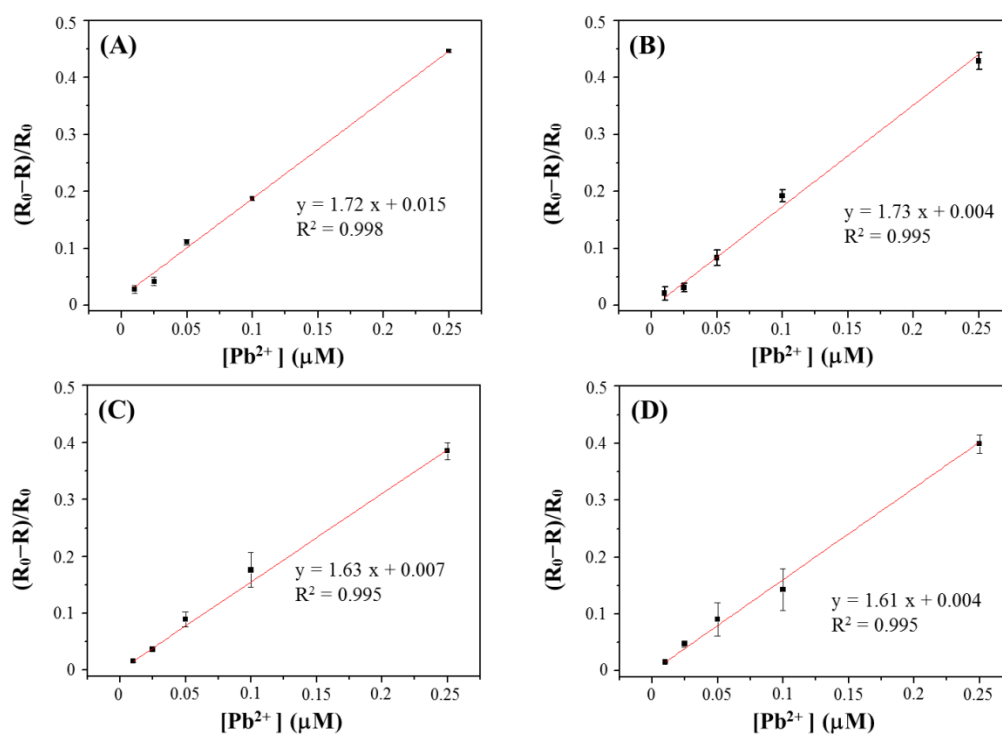

**Figure S7.** Standard addition analyses of (A) pond water, (B) lake water, (C) seawater, and (D) urine samples using the  $S_2O_3^{2-}/Au$  NRs probe. Aliquots of the samples were spiked with  $Pb^{2+}$  (0.01–0.25  $\mu M$ ). The other conditions were the same as described in Figure 4.
